# Supplementary material for: Themes in Train-the-Trainer Nutrition Education Interventions Targeting Middle School Students: A Systematic Review
Source: MDPI journal article supplement (doi:10.3390/nu13082749), 2021-08-10
Supplement: s1 [file s1]

**Figure S1:** Electronic search strategy for PubMed/Medline Database.

Search (((((((middle school OR youth OR student\* OR adolescen\* OR preadolescen\* OR teen\* OR school-age OR junior high OR young adult\* OR young people OR "adolescent"[Mesh] OR "child"[Mesh])) AND (((nutrition\* or diet\*) adj2 (communication\* or education or intervention\* or messag\* or advice or promot\* or aware\* or behavi\*))).tw. OR nutrition program OR obesity prevention OR food choice OR food preference\* OR food consum\* OR "Child Nutrition Sciences"[Mesh] OR "Nutritional Sciences/education"[Mesh] OR "Nutritional Sciences/methods"[Mesh] OR "Diet, Healthy"[Mesh] OR "Food"[Mesh] OR "Diet"[Mesh])) AND (coach OR mentor\* OR mentor-led OR teacher OR peer OR peer-led OR role model OR participatory research OR "Peer Group"[Mesh] OR "Mentor"[Mesh])) AND (urban OR city OR poverty)))) Sort by: Best Match Filters: Publication date from 2005/01/01 to 2020/05/28; English.
